# Supplementary material for: Poly(alkyl-biphenyl pyridinium)-Based Anion Exchange Membranes with Alkyl Side Chains Enable High Anion Permselectivity and Monovalent Ion Flux
Source: MDPI journal article supplement (doi:10.3390/membranes13020188), 2023-02-03
Supplement: s1 [file s1]

## **Supporting Information**

**Poly(alkyl-biphenyl pyridinium)-based anion exchange membranes with alkyl side chains enable high anion permselectivity and monovalent ion flux**

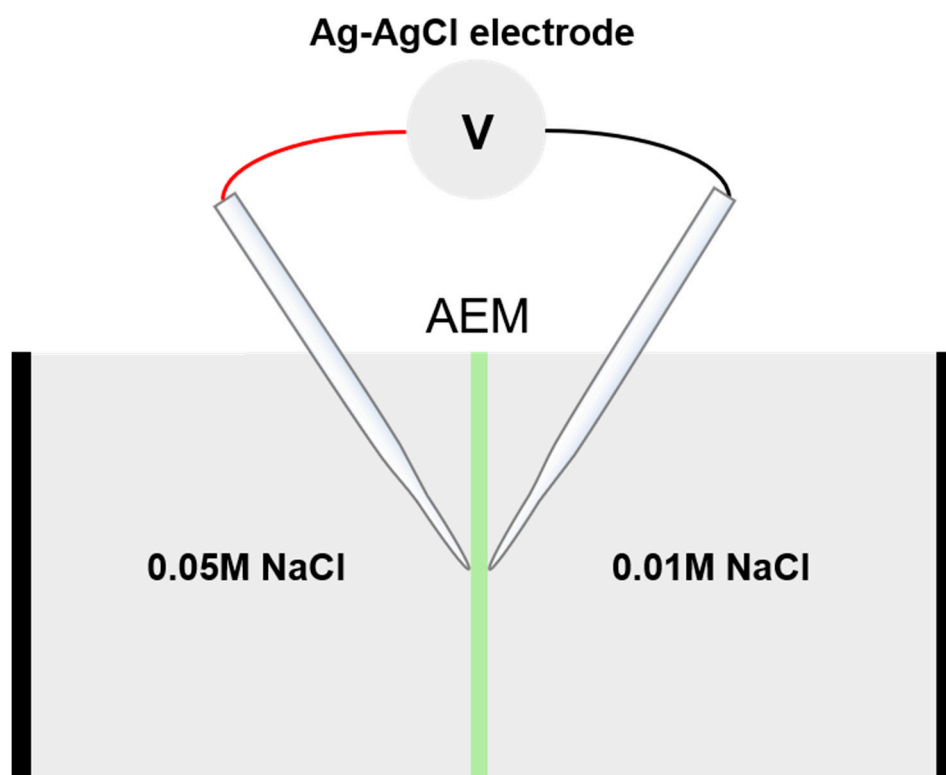

Figure S1. Schematic illustration for Membrane transport number.

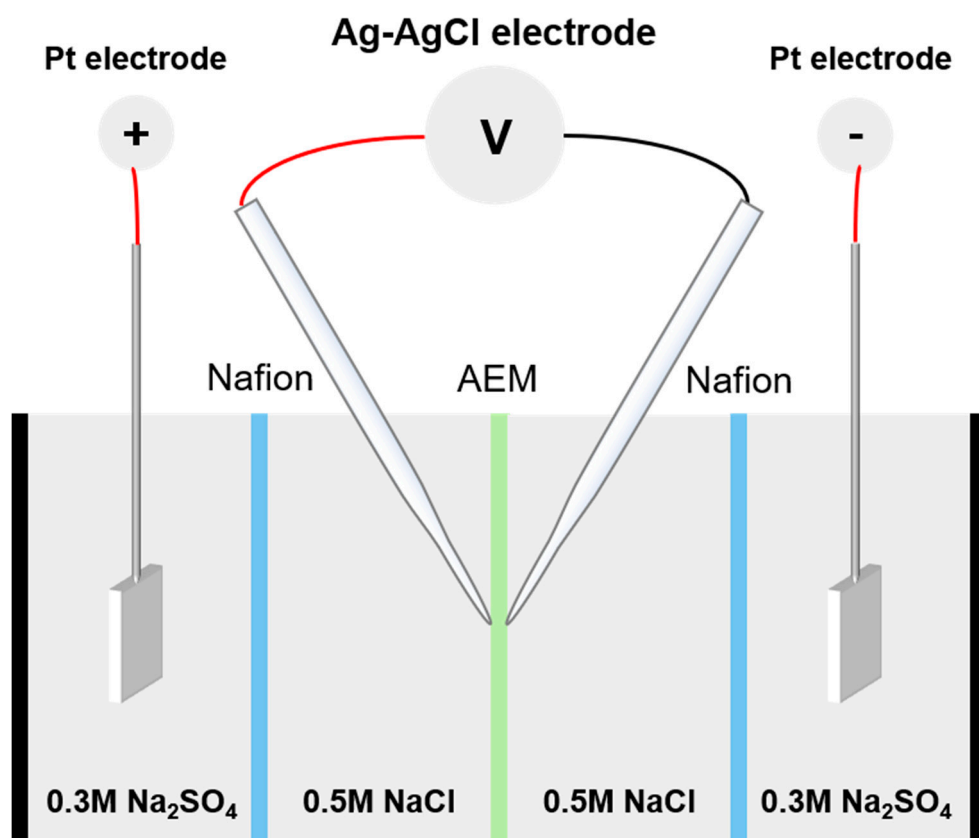

Figure S2. Schematic illustration for current-voltage (I-V) curves and membrane area resistance.

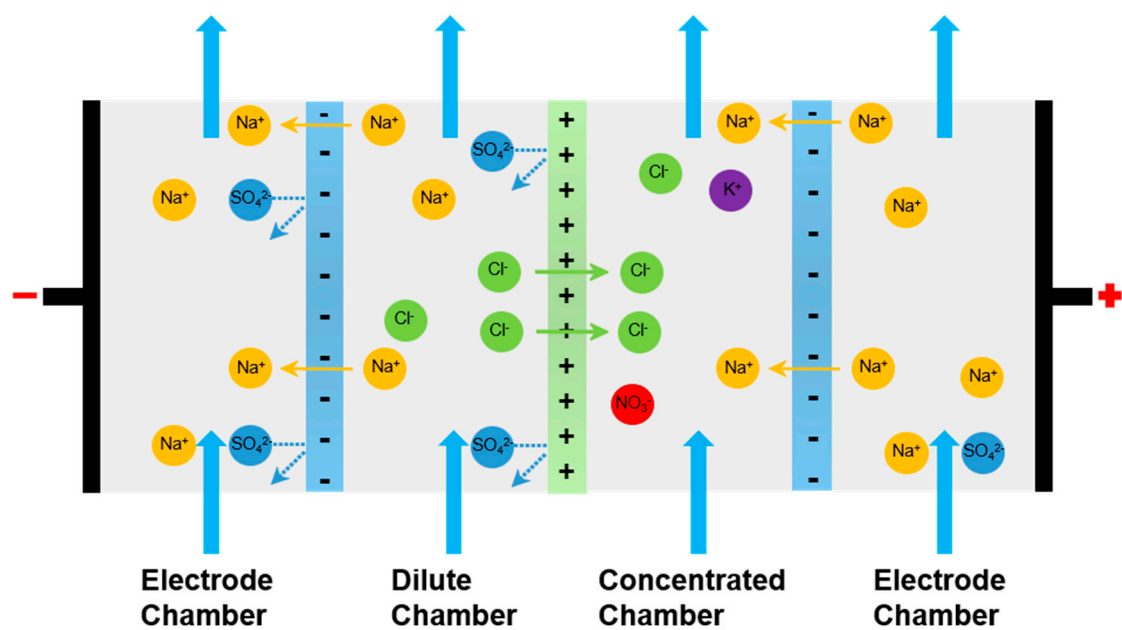

Figure S3. Schematic illustration for the ED process.

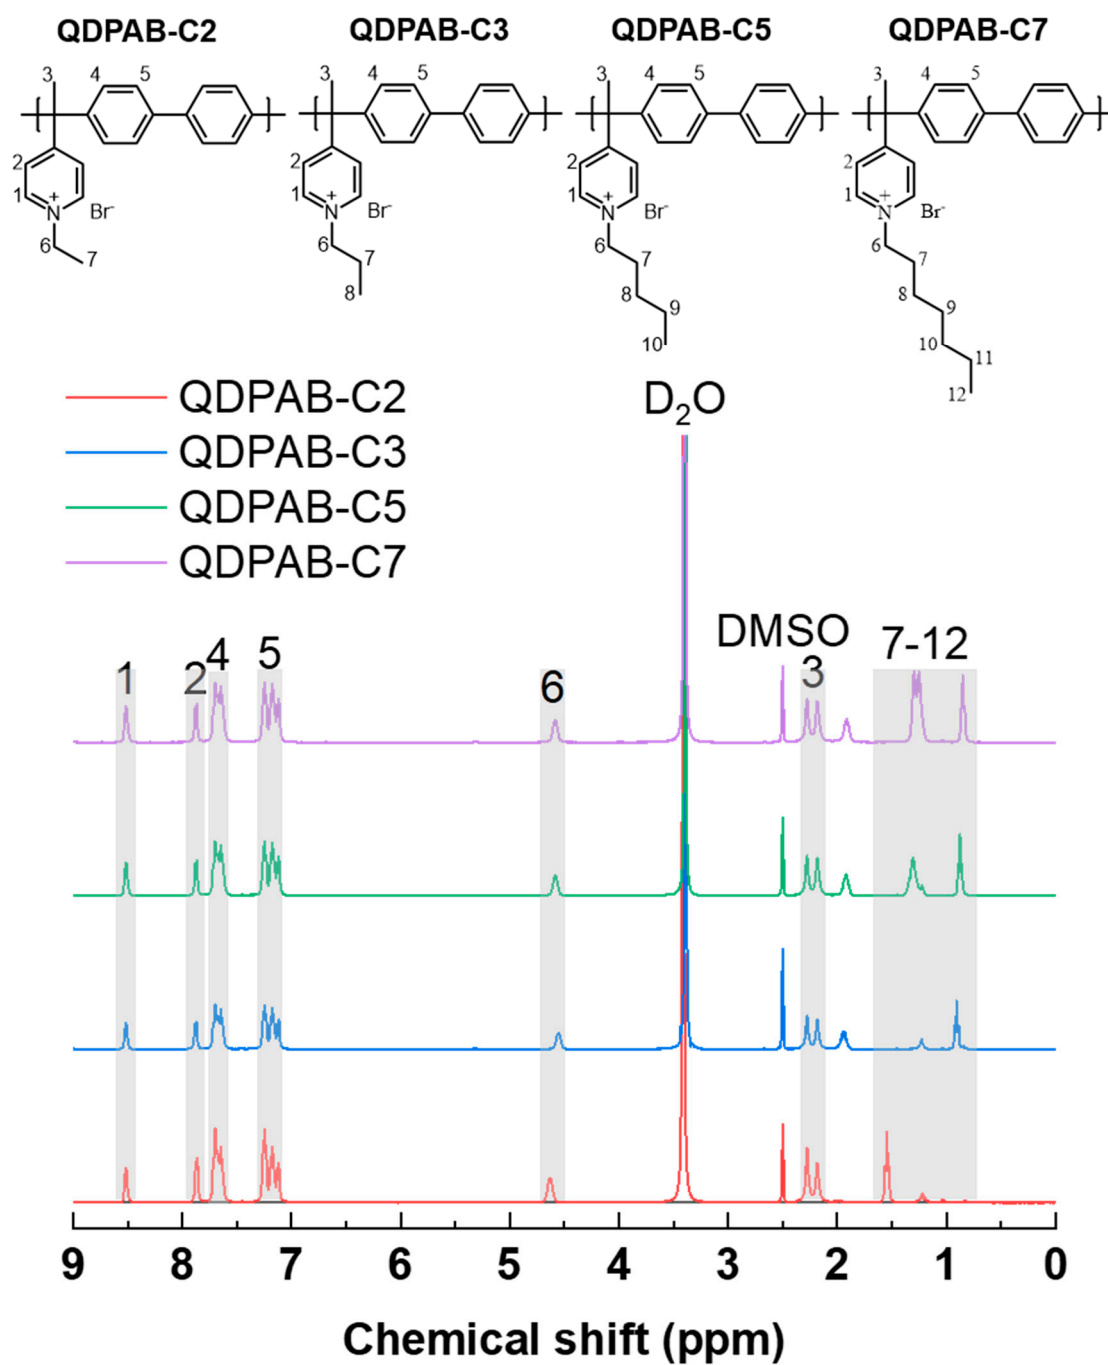

Figure S4.  $^1\text{H}$  NMR spectra of QDPAB-C2, QDPAB-C3, QDPAB-C5 and QDPAB-C7

membranes.
